# 1 **Effect of Exogenous Amino Acids on Yield and Quality of Tartary** 2 **Buckwheat in Non-saline and Saline-alkali Soil**

3 Jin-Nan Song<sup>\*1</sup>, Ya-Qi Wang<sup>\*1</sup>, Fa-Liang Li<sup>2</sup>, Yan-Jiang Hu<sup>1</sup>, Hong-Bing Yang<sup>\*\*1</sup>

4

5 <sup>1</sup> Key Lab of Plant Biotechnology in Universities of Shandong Province, College of Life Sciences, Qingdao Agricultural University,  
6 Qingdao 266109, Shandong, China.

7 <sup>2</sup> Research Station of Alpine Crop, Department of Agriculture and Science, Liangshan 616150, Sichuan, China.

8

9 \* These authors have contributed equally to this work.

10 \*\* **Correspondence:** Hong-Bing Yang, [hbyang@qau.edu.cn](mailto:hbyang@qau.edu.cn)

11

12 **SUMMARY Heading:** Amino acids on yield and quality of Tartary buckwheat

13 Salt-tolerant variety of Chuanqiao No.1 and salt-sensitive variety of Chuanqiao No.2 in Tartary buckwheat were  
14 used as experimental materials, through treatment of foliar spraying amino acids to study the effect of exogenous  
15 amino acids on yield and quality of Tartary buckwheat in non-saline and saline-alkali soil. The results showed  
16 that the treatment of amino acids could significantly increase the Tartary buckwheat yield in saline-alkali soil,  
17 under appropriate treatment of amino acids, the content of seed protein, mineral element and rutin in two Tartary  
18 buckwheat varieties was significantly increased in non-saline and saline-alkali soil, and that in salt-tolerant  
19 Tartary buckwheat variety was increased obviously higher than that in salt-sensitive one. It indicated that the  
20 effect of exogenous amino acids on yield and quality varies obviously between the two Tartary buckwheat  
21 varieties. In addition, through measuring the soil composition of non-saline and saline-alkali soil, we found that  
22 the content of calcium in saline-alkali soil was higher, and that of iron and selenium in saline-alkali soil was  
23 significantly lower than that in non-saline one, while that of calcium, iron and selenium of Tartary buckwheat  
24 seeds in saline-alkali soil was significantly higher than that in non-saline one, indicating that the Tartary  
25 buckwheat in saline-alkali soil shows enrichment in calcium, iron and selenium, and should be more nutritious  
26 than that in non-saline one. From the actual usage of amino acids, the amount of amino acid used per hectare is  
27 less and the price is low, so it is very suitable for popularization and application in saline-alkali soil.

28 **Keywords:** Tartary buckwheat, amino acids, non-saline and saline-alkali soil, yield, quality

29

## 30 **Core Ideas**

- 31 ● Amino acids treatment could significantly increase the yield of Tartary buckwheat in saline-alkaline soil.
- 32 ● Appropriate amino acid treatment could make the Tartary buckwheat in saline-alkali soil more nutritious.
- 33 ● This way with low cost is very suitable for popularization and application in saline-alkali soil.

34

## 35 **Introduction**

36 Saline-alkali soil is a kind of soil with high pH, poor permeability, easy surface hardening and low nutrient  
37 content. It accumulates too much salt on the surface. Therefore, most plants are difficult to survive, which has  
38 become an important factor restricting the development of agriculture and animal husbandry, leading to the  
39 deterioration of the ecological environment and other issues. It is reported that the area of saline alkali soil in  
40 China is nearly 100 million hectare (Zhu et al., 2018), and the loss of agricultural production caused by soil  
41 salinization is difficult to estimate (Li et al., 2008). Recently, research on plant physiological characteristics in  
42 saline-alkali soil is mostly focused on wheat (Yang et al., 2001), cotton (Wang et al., 2007), soybean (Pan et al.,  
43 2007) and other crops, while the studies on physiological and biochemical characteristics of buckwheat in  
44 saline-alkali soil are few, even, researches on yield, nutrition and health components of buckwheat under the  
45 saline-alkali condition are less than that on physiological and biochemical characteristics, as a result, it has  
46 become an urgent and important task to improve the yield and quality of crops in the saline-alkali soil. With the  
47 deepening understanding of stress resistance mechanism in plants, mining crop stress resistance has become a  
48 hot research topic and a promising way to improve crop yield and quality. Buckwheat (*Fagopyrum esculentum*)  
49 is a dicotyledonous plant of *Fagopyrum*, because its seeds are triangular ovoid, also known as triangular rice  
50 (Meng, 2011). Buckwheat is rich in protein, vitamin B, mineral nutrition, plant fiber, rutin, etc. It also contains  
51 special trace element and medicinal ingredients, which can prevent and treat modern civilization diseases and  
52 cardiovascular and cerebrovascular diseases in the middle and old age, while other food crops lack these  
53 elements and medicinal ingredients. Buckwheat is rich in cultivation and wild resources, among which Tartary  
54 buckwheat has the best edible quality and health care effect, it has become raw materials in high-grade food,  
55 health food and medicine (He and Hui, 2008). With the gradual improvement of people's living standards,  
56 people's dietary structure began to develop in a healthy and natural direction. This kind of food is more and more  
57 popular because of its reputation of "dual-use of medicine and food". Therefore, vigorous development and  
58 research on nutrition and health care products have a broad market prospect and high social and economic value

59 (Yang and Yang, 2002).

60 Protein content reflects the nutritional value of plants to a certain extent, so it is of great practical  
61 significance to study the effect of exogenous substances on protein content of crops. The main bioactive  
62 components of buckwheat are glutenin, water-soluble globulin and salt-soluble albumin, this glutenin is different  
63 from grain protein but similar to legume protein, and the protein quality of buckwheat is better than that of rice,  
64 wheat and maize (Du et al., 2004). From the amino acid composition of protein, it can be seen that buckwheat  
65 protein contains 18 kinds of amino acids, including 8 kinds essential amino acids for human beings. Moreover,  
66 its composition and proportion are similar to that of egg protein and meet or exceed the standard of essential  
67 amino acid content of food protein drafted by FAO and WHO.

68 The World Health Organization points out that the essential trace elements for human body include iron,  
69 nickel, selenium, manganese, copper, silicon, chromium, zinc, tin, cobalt, fluorine, iodine, etc., which are closely  
70 related to human life activities due to their important roles in metabolic process. Mineral elements contain  
71 calcium, iron, zinc, selenium, copper, magnesium, potassium, etc., which are rich in Tartary buckwheat, and they  
72 are important sources of essential nutrients for human body (Zhu et al., 2009). Vitamin B<sub>2</sub>, a riboflavin, plays an  
73 important role in maintaining human visual function and promoting cell growth and regeneration.

74 Rutin or vitamin P, is a kind of flavonoid with strong anti-inflammatory effect, it can maintain and restore  
75 the normal function of capillary, maintain vascular resistance, reduce vascular permeability and fragility. It also  
76 has the function of inhibiting aldose reductase, which is beneficial to the treatment of diabetic cataract. Some  
77 representative modern civilization diseases, such as cardiovascular and cerebrovascular diseases, diabetes,  
78 obesity and gout etc., rutin has been achieved certain results in remission and treatment research on these  
79 diseases, it can promote insulin secretion by affecting the function of pancreatic  $\beta$  cells to reduce blood sugar, at  
80 the same time, it can regulate blood pressure, increase blood vessel toughness and elasticity, so it can prevent and  
81 treat cerebral hemorrhage and subarachnoid hemorrhage (Ma and Pang, 2013). Therefore, rutin can be used not  
82 only to treat or alleviate modern civilization diseases, but also to further study its biological activity and make  
83 full use of health care functions as a green and pure natural drug (Zang et al., 2007).

84 Study has shown that exogenous Pro could significantly improve the physiological characteristics of  
85 buckwheat seedlings under salt stress, and the best mitigation effect on salt stress in buckwheat seedlings is Pro  
86 treatment with concentration of 30  $\mu$ M (Chen and Yang, 2012). Glu treatment could also significantly improve  
87 the salt tolerance of buckwheat seedlings, and the optimum concentration of Glu treatment is 60  $\mu$ M (Ji et al.,

88 2014). In addition, appropriate concentration of Asp treatment could significantly promote the seed germination  
89 and seedling growth of buckwheat under salt stress, and significantly increase the root vigor and chlorophyll  
90 content of buckwheat seedlings under salt stress, and the optimum concentration of Asp treatment is 40  $\mu\text{M}$   
91 (Yang, 2014). Therefore, chemical regulation is also an effective way to improve stress resistance of crops. At  
92 present, there is no relevant report on application of amino acids to improve yield and quality of buckwheat. In  
93 this paper, salt-tolerant variety of Chuanqiao No.1 and salt-sensitive variety of Chuanqiao No.2 in Tartary  
94 buckwheat were used as experimental materials, through sowing in non-saline and saline-alkali soil, and foliar  
95 spraying with the treatment of 3 kinds of amino acids, the indexes of Tartary buckwheat yield, seed protein  
96 content, mineral element content, content of vitamin B<sub>2</sub> and rutin were determined to study the effect of  
97 exogenous amino acids on yield and quality of different Tartary buckwheat varieties, and it aims to provide some  
98 basis for improving the yield and quality of crops.

## 99 **Materials and Methods**

### 100 **Materials Culture and Treatment**

101 Salt-tolerant variety of Chuanqiao No.1 and salt-sensitive variety of Chuanqiao No.2 in Tartary buckwheat  
102 were used as experimental materials, and were respectively sown in saline-alkali soil with salt concentration of  
103 0.6% and non-saline soil in drill, and the sowing space and rowing spacing were 20 cm and 30 cm, and the area  
104 of each split plot was 0.1  $\text{hm}^2$ , then applying foliar spraying with 3 kinds of amino acids twice during the  
105 seedling growth and flowering stage. The treatment concentration of Pro is 30  $\mu\text{M}$  (Chen and Yang, 2012), and  
106 that of Glu and Asp is 60  $\mu\text{M}$  and 40  $\mu\text{M}$  (Ji et al., 2014) respectively. From 2016 to 2018, Tartary buckwheat  
107 was sown on June 26 and harvested on September 26 every year, comparing the quality differences among the  
108 three batches of Tartary buckwheat seeds. Three repetitions were set in per treatment each year.

### 109 **Crop Management**

110 The method of Wan (2003) was referred for field management. The seedling stage of Tartary buckwheat is  
111 more drought-tolerant and water should not be too much. When meeting rainy conditions, it is necessary to  
112 exclude accumulated water in time, while the water demand of flowering season is more, and it can be watered  
113 properly. It is advisable to choose sunny day when applying amino acids treatment and to spray the leaves  
114 without dropping water. The yield of Tartary buckwheat was measured by random sampling in 5 points.

### 115 **Determination of Mineral Element Content**

116 The content of nitrogen (N) in soil was determined by the Kjeldahl method (Wu et al., 2009), and that of

117 other mineral elements was determined by ICP-OES inductively coupled plasma emission spectrometer. 1 g  
118 sample was taken to the digestive tube, mixed acid (10 mL HNO<sub>3</sub> and 2 mL HClO<sub>4</sub>) was put in, and sample was  
119 static sealed overnight. On the following day, heating on the temperature control and digestion instrument, and  
120 maintaining the micro boiling state (160°C~170°C), when a large amount of brown NO<sub>2</sub> gas came out for about 1  
121 h, continuing to heat until brown gas disappeared. Sample liquid gradually became light yellow, when it turned  
122 to transparent, it would completely digest, didn't stop heating evaporation to remove a large amount of HNO<sub>3</sub>  
123 and HClO<sub>4</sub> until the solution was left in the tube with about 1 mL. After a slight cooling, directly poured the  
124 water into digestion tube for about 10 mL, kept heating and removing acid in the digestion apparatus in micro  
125 boiling for 5 min, then transferred the sample solution to 25 mL volumetric flask and set the constant volume  
126 with deionized water after cooling. ICP-OES was used to determinate the mineral element content.

### 127 **Determination of Protein, Vitamin B<sub>2</sub> and Rutin Content**

128 Referring the method of [Hui et al. \(2004\)](#) to determine the protein content in buckwheat seeds; referring the  
129 high performance liquid chromatography method of [Liang et al. \(2005\)](#) to determine vitamin B<sub>2</sub> content; referring  
130 the ethanol extraction method of [Jia et al. \(1998\)](#) to extract rutin in buckwheat seeds; referring the high  
131 performance liquid chromatography method of [Zhang et al. \(2003\)](#) to determine the rutin content.

### 132 **Determination of Soil Composition**

133 In the study of soil properties, 3 samples were collected from soil under 10 cm. The determination of soil  
134 composition including determination of a large number of elements and trace elements, a large number of  
135 elements include P, N, K, Ca, and Mg, and trace elements include Fe, Mn, B, Zn, and Se. Referring the Kjeldahl  
136 method of [Wu et al. \(2009\)](#) to determine nitrogen content in soil; ICP-OES was adopted to determinate other  
137 mineral element content in soil.

### 138 **Data Processing**

139 The method of variance calculation was used to process the seed quality data obtained during the two years.  
140 Using ANOVA and t-test to analysis the significant difference of data between different amino acid treatments  
141 and two Tartary buckwheat varieties ([Wang et al., 2010](#)), and each test sample was provided with 3 duplicates.

## 142 **Results**

### 143 **Effect of Exogenous Amino Acids on Tartary Buckwheat Yield in Non-saline and Saline-alkali Soil**

144 Figure 1 shows the yield of Tartary buckwheat in non-saline and saline-alkali soil, under the treatment of  
145 Asp, the yield of Chuanqiao No.1 in non-saline soil was increased significantly, which was increased by 7.78%

146 than the control, while under the treatment of Pro, Glu and Asp, that of Chuanqiao No.1 in saline-alkali soil was  
147 all increased significantly, which was increased by 28.58%, 22.72% and 39.92% respectively than the control,  
148 and the largest increase of the treatment among them was Asp. The effect of exogenous amino acids on yield of  
149 Chuanqiao No.2 in non-saline soil was small, although there was a slight increase, there was no significant  
150 difference between the treatment and the control, however, under the treatments of Pro, Glu and Asp, that of  
151 Chuanqiao No.2 in saline-alkali soil was increased significantly, which was increased by 12.61%, 30.92% and  
152 20.94% respectively than the control, and the largest increase of the treatment among them was Glu. Under the  
153 treatment of 3 kinds of amino acids, the yield of Chuanqiao No.1 in non-saline or saline-alkali soil was  
154 significant higher than that of Chuanqiao No.2.

### 155 **Effect of Exogenous Amino Acids on Protein Content of Tartary Buckwheat in Non-saline and** 156 **Saline-alkali Soil**

157 Figure 2 shows the protein content of Tartary buckwheat in non-saline and saline-alkali soil, the seed  
158 protein content of Tartary buckwheat in non-saline and saline-alkali soil was increased in different degrees under  
159 the treatments of 3 kinds of exogenous amino acids, under the treatment of Pro, that of Chuanqiao No.1 in  
160 saline-alkali soil was increased significantly, which was increased by 14.56% than the control, and under the  
161 treatment of Asp, that of Chuanqiao No.1 in non-saline and saline-alkali soil was increased significantly, which  
162 was increased by 22.32% and 29.93% respectively than the control. Under the treatment of Glu, that of  
163 Chuanqiao No.2 in non-saline and saline-alkali soil was increased significantly, which was increased by 14.46%  
164 and 20.68% respectively than the control. Under the treatment of proline and aspartic acid, the seed protein  
165 content of Chuanqiao No.1 was significantly higher than that of Chuanqiao No.2.

### 166 **Effect of Exogenous Amino Acids on Calcium (Ca) Content of Tartary Buckwheat in Non-saline and** 167 **Saline-alkali Soil**

168 Figure 3 shows the Ca content of Tartary buckwheat in non-saline and saline-alkali soil, there are obviously  
169 different effect of exogenous amino acids on seed calcium content of different Tartary buckwheat varieties,  
170 under the treatments of Pro, Glu and Asp, the seed Ca content of Chuanqiao No.1 in non-saline soil was  
171 increased significantly, which was increased by 83.90%, 71.16% and 90.69% respectively than the control, and  
172 the largest increase of the treatments among them was Asp, and under the treatments of Pro and Glu, that of  
173 Chuanqiao No.1 in saline-alkali soil was increased significantly, which was increased by 46.91% and 27.13%  
174 respectively than the control, the larger increase between them was Pro. Under the treatments of Pro and Asp,

175 that of Chuanqiao No.2 in non-saline soil was increased significantly, which was increased by 34.31% and  
176 75.36% respectively than the control, and the larger increase between them was Asp, and under the treatment of  
177 Pro, that of Chuanqiao No.2 in saline-alkali soil was increased significantly, which was increased by 45.26%  
178 than the control. Under the treatment of proline and glutamic acid, the seed Ca content of Chuanqiao No.1 in  
179 non-saline soil was significantly higher than that of Chuanqiao No.2; while that of Chuanqiao No.2 in  
180 saline-alkali soil was significantly higher than that of Chuanqiao No.1 under the treatment of proline and aspartic  
181 acid.

### 182 **Effect of Exogenous Amino Acids on Iron Content of Tartary Buckwheat in Non-saline and Saline-alkali** 183 **Soil**

184 Figure 4 shows the Fe content of Tartary buckwheat in non-saline and saline-alkali soil, there is no  
185 significant change of seed iron (Fe) content of the two Tartary buckwheat varieties in non-saline soil under the  
186 treatment of 3 kinds of amino acids. It indicated that the effect of exogenous amino acids treatment on seed Fe  
187 content in non-saline soil was small. Under the treatments of Pro, Glu and Asp, the seed Fe content of Chuanqiao  
188 No.1 in saline-alkali soil was increased significantly, which was increased by 194.85%, 85.46% and 82.83%  
189 respectively than the control, and the largest increase of the treatment among them was Pro, and under the  
190 treatments of Pro and Glu, that of Chuanqiao No.2 in saline-alkali soil was increased significantly, which was  
191 increased by 76.69% and 59.52% respectively than the control, and the larger increase of the treatment between  
192 them was Pro. Under the treatment of 3 kinds of amino acids, the seed iron content of Chuanqiao No.1 in  
193 saline-alkali soil was significantly higher than that of Chuanqiao No.2.

### 194 **Effect of Exogenous Amino Acids on Zinc Content of Tartary Buckwheat in Non-saline and Saline-alkali** 195 **Soil**

196 Figure 5 shows the Zn content of Tartary buckwheat in non-saline and saline-alkali soil, the seed Zn content  
197 of two Tartary buckwheat varieties in saline-alkaline soil was generally larger than that in non-saline one under  
198 the treatment of 3 kinds of amino acids. With the treatments of Glu and Asp, the seed Zn content of Chuanqiao  
199 No.1 in non-saline soil was increased significantly, which was increased by 37.88% and 46.64% respectively  
200 than the control, the larger increase between them was Asp. With the treatments of Pro, Glu and Asp, that of  
201 Chuanqiao No.1 in saline-alkali soil was increased significantly, which was increased by 32.16%, 30.14% and  
202 58.85% respectively than the control, the largest increase of the treatment among them was Asp, and that of  
203 Chuanqiao No.2 in non-saline soil was increased significantly, which was increased by 22.90%, 26.22% and

204 44.57% respectively than the control, the largest increase of the treatment among them was Asp. With the  
205 treatments of Glu and Asp, that of Chuanqiao No.2 in saline-alkali soil was increased significantly, which was  
206 increased by 24.33% and 32.40% respectively than the control, and the larger increase of the treatment between  
207 them was Asp. Under the treatment of proline, the seed Zn content of Chuanqiao No.1 was significantly higher  
208 than that of Chuanqiao No.2.

#### 209 **Effect of Exogenous Amino Acids on Selenium (Se) Content of Tartary Buckwheat in Non-saline and** 210 **Saline-alkali Soil**

211 Figure 6 shows the Se content of Tartary buckwheat in non-saline and saline-alkali soil, there is no  
212 significant change of seed Se content in non-saline and saline-alkali soil of the two Tartary buckwheat varieties  
213 under the treatment of 3 kinds of amino acids. It indicated that the effect of 3 kinds of exogenous amino acids  
214 treatment on seed Se content in non-saline soil was small. With the treatments of Pro and Glu, seeds Se content  
215 of Chuanqiao No.1 in saline-alkali soil was increased significantly, which was increased by 29.37% and 21.27%  
216 respectively than the control, and the larger increase of the treatment between them was Pro, with the treatment  
217 of Asp, seed Se content of Chuanqiao No.2 in saline-alkali soil was increased significantly, which was increased  
218 by 20.35% than the control. Under the treatment of 3 amino acids, the seed Se content of Chuanqiao No.2 in  
219 non-saline or saline-alkali soil was significantly higher than that of Chuanqiao No.1.

#### 220 **Effect of Exogenous Amino Acids on Vitamin B<sub>2</sub> Content of Tartary Buckwheat in Non-saline and** 221 **Saline-alkali Soil**

222 Figure 7 shows the vitamin B<sub>2</sub> content of Tartary buckwheat in non-saline and saline-alkali soil, under the  
223 treatments of Pro, Glu and Asp, the seed vitamin B<sub>2</sub> content of Chuanqiao No.1 in non-saline and saline-alkali  
224 soil had a small change, and that in saline-alkali soil was slightly higher than that in non-saline one. Under the  
225 treatments of Glu, that of Chuanqiao No.2 in saline-alkali soil was lower than that in non-saline one, while under  
226 the treatments of Pro and Asp, that of Chuanqiao No.2 in saline-alkali soil was higher than that in non-saline one,  
227 however, both did not reach the level of significant difference. It indicated that the effect of 3 kinds of amino  
228 acids on seed vitamin B<sub>2</sub> content of the two Tartary buckwheat varieties in non-saline and saline-alkali soil was  
229 small.

#### 230 **Effect of Exogenous Amino Acids on Rutin Content of Tartary Buckwheat in Non-saline and Saline-alkali** 231 **Soil**

232 Figure 8 shows the rutin content of Tartary buckwheat in non-saline and saline-alkali soil, under the



233 treatment of Asp, the seed rutin content of Chuanqiao No.1 in non-saline and saline-alkali soil was increased  
 234 significantly, which was increased by 30.38% and 18.56% respectively than the control, and with the treatment  
 235 of Pro, that of Chuanqiao No.2 was increased significantly, which was increased by 17.80% than the control,  
 236 while that of Chuanqiao No.2 in saline-alkali soil had no significant difference change under the treatment of 3  
 237 kinds of amino acids. It indicated that the effect of 3 kinds of amino acids on seed rutin content of Chuanqiao  
 238 No.2 in saline-alkali soil was small. Under the treatment of proline, the seed rutin content of Chuanqiao No.2 in  
 239 non-saline soil was significant higher than that of Chuanqiao No.1.

#### 240 **Element Content in Non-saline and Saline-alkali Soil**

241 Table 1 shows the large amount of element content in non-saline and saline-alkali soil, there is no  
 242 significant difference of N content between non-saline and saline-alkali soil, while the content of P, K, Ca and  
 243 Mg in non-saline soil was significantly different from that in saline-alkali one, and the content of P in  
 244 saline-alkali soil was 39.53% lower than that in non-saline one, while the content of K, Ca and Mg in  
 245 saline-alkali soil was 23.84%, 217.97% and 339.13% higher than that in non-saline one respectively.

246 **Table 1. Large amount of element content in non-saline and saline-alkali soil.**

| Element content    | N(mg/g)                | P(mg/g)                | K(mg/g)                 | Ca(mg/g)                | Mg(mg/g)               |
|--------------------|------------------------|------------------------|-------------------------|-------------------------|------------------------|
| Non-saline soil    | 0.91±0.10 <sup>c</sup> | 0.86±0.09 <sup>f</sup> | 13.63±1.27 <sup>b</sup> | 4.23±0.34 <sup>c</sup>  | 0.46±0.05 <sup>e</sup> |
| Saline-alkali soil | 0.95±0.11 <sup>c</sup> | 0.52±0.07 <sup>g</sup> | 16.88±1.53 <sup>a</sup> | 13.45±1.06 <sup>b</sup> | 2.02±0.41 <sup>d</sup> |

247 Table 2 shows the trace element content in non-saline and saline-alkali soil, there is no significant difference  
 248 of trace element content of Mn and Zn between non-saline and saline-alkali soil, while the content of Fe, B and  
 249 Se in saline-alkali soil was significantly lower than that in non-saline one, which was 44.27%, 98.76% and  
 250 44.31% lower than that in non-saline one respectively.

251 **Table 2. Trace element content in non-saline and saline-alkali soil.**

| Element content    | Fe(mg/g)                | Mn(mg/g)               | B(μg/g)                 | Zn(μg/g)                 | Se(ng/g)                  |
|--------------------|-------------------------|------------------------|-------------------------|--------------------------|---------------------------|
| Non-saline soil    | 33.93±2.65 <sup>d</sup> | 0.44±0.05 <sup>g</sup> | 10.49±0.86 <sup>f</sup> | 61.10±5.06 <sup>c</sup>  | 131.77±12.23 <sup>a</sup> |
| Saline-alkali soil | 18.91±1.56 <sup>e</sup> | 0.46±0.06 <sup>g</sup> | 0.13±0.03 <sup>h</sup>  | 67.66±6.10 <sup>bc</sup> | 73.38±6.35 <sup>b</sup>   |

#### 252 **Discussion**

253 Study showed that the azophoska could significantly improve the biological yield of sweet sorghum in

254 saline-alkali soil (Wang et al., 2013). This article illustrated that the effect of exogenous amino acids on yield in  
255 non-saline soil was small while that on the yield in saline-alkali one was high, and the yield of two Tartary  
256 buckwheat varieties in saline-alkali soil increased significantly under the treatment of 3 kinds of amino acids.  
257 The effect of Asp treatment on yield increasement was the best in salt-tolerant Tartary buckwheat variety, while  
258 that of Glu treatment on yield increasement was the best in salt-sensitive Tartary buckwheat variety, and the yield  
259 of salt-tolerant Tartary buckwheat variety increased more than that of salt-sensitive one. In addition, the yield of  
260 Tartary buckwheat in saline-alkali soil changed little in the past 2 years, indicating that the effect of saline-alkali  
261 soil environment on yield of Tartary buckwheat was small, while the external application of amino acids was an  
262 important factor affecting the yield of Tartary buckwheat in saline-alkali soil, and the experimental data were  
263 reliable and persuasive.

264 The soluble protein content of leaves in Pingshan pomelo and citrus seedling could increase obviously  
265 under salt stress, and that would increase to a higher level with the increasing concentration of salt stress (Ma et  
266 al., 2005); Song et al. (2008) had founded that the appropriate concentration of 5-amino acid (ALA) treatment  
267 could significantly promote the growth of spinach and significantly increase the soluble protein content so as to  
268 improve the quality of spinach. As shown in this article, the seed protein content of salt-tolerant variety increased  
269 obviously in saline-alkali soil, and that of salt-tolerant variety increased significantly under the treatment of Asp,  
270 and that of salt-sensitive variety increased significantly under the treatment of Glu, and the increase in  
271 saline-alkali soil was more than that in non-saline one, also, the increase of salt-tolerant variety was more than  
272 that of salt-sensitive one.

273 Calcium is one of the essential elements of the human body, the calcium supplementation has a slowing  
274 effect on bone losses, it helps to lower cholesterol levels in the blood so as to prevent heart diseases (Ye et al.,  
275 1998). As shown in this article, the seed calcium content of two buckwheat varieties in non-saline soil was  
276 increased significantly under the treatment of Pro and Asp, and that under the treatment of Asp increased more  
277 than that of Pro, and that of salt-tolerant variety increased more than that of salt-sensitive one, and that of two  
278 Tartary buckwheat varieties in saline-alkali soil was increased significantly under the treatment of Pro. The trace  
279 element iron is an important component of hemoglobin, and the iron element has a catalysis function to promote  
280  $\beta$ -carotene into vitamin A, and to promote the synthesis of purine, collagen and antibody. In addition, the iron  
281 can also enhance the body immunity and the swallow capability of neutrophils and macrophages. As shown in  
282 this article, the effect of exogenous amino acids on seed iron content in non-saline soil was small, while the seed

283 iron content of the two kinds of Tartary buckwheat varieties in saline-alkali soil was increased significantly  
284 under the treatment of Pro and Glu, and the increase under the treatment of Pro was more than that under the  
285 treatment of Glu, and that in salt-tolerant variety was increased more than that in salt-sensitive one. Zinc can  
286 promote the growth and development in human body, and the serious lack of zinc in children would induce  
287 “dwarf” and mental retardation (Zhang et al., 2000). Zinc is a nutritional element in the development of thymus,  
288 only the sufficient amount of zinc could effectively guarantee the development of the thymus, and the normal T  
289 lymphocyte could be differentiated (CETTIC, 2007). As shown in this article, the seed zinc content of the two  
290 kinds of Tartary buckwheat varieties in non-saline and saline-alkali soil was increase significantly under the  
291 treatment of Glu and Asp, and the increase under the treatment of Asp was more than that under the treatment of  
292 Glu, and that of salt-tolerant variety was increased more than that of salt-sensitive one. Selenium (Se) is a very  
293 scarce trace element, and few foods rich in selenium. Se is the component of antioxidant enzymes in the body, so  
294 it could protect the cell membranes from oxidative damage, also, it could protect the  $\beta$  cells of pancreatic islet  
295 and maintain their normal functions, which could effectively improve the symptoms of diabetic patients (Chen,  
296 2012). This article showed that the effect of exogenous amino acids on seed Se content in non-saline soil was  
297 small, while the seed Se content of salt-tolerant Tartary buckwheat variety in saline-alkali soil was increased  
298 significantly under the treatment of Pro and Glu, and the increase under the treatment of Pro was more than that  
299 under the treatment of Glu, and that of salt-sensitive Tartary buckwheat variety in saline-alkali soil was increased  
300 significantly under the treatment of Asp.

301 UV-B could increase the activity of enzyme in the route of dilantin synthesis pathway, and promoting the  
302 accumulation of rutin in buckwheat (Kreft et al., 2002), therefore, long time sunshine could promote the  
303 synthesis of rutin in buckwheat. The average rutin content of *Fagopyrum esculentum* in long time sunshine was  
304 obviously higher than that in short sunshine time (Kim et al., 2002), and the rutin content of buckwheat in  
305 summer sowing was almost two times as that in autumn sowing, it indicated that the rutin content increasing of  
306 buckwheat was closely related to the sunlight (Fabjan et al., 2003). As shown in this article, the seed rutin  
307 content of salt-tolerant variety was increased significantly under the treatment of Asp, and the increase in  
308 non-saline soil was more than that in saline-alkali one, and that of salt-sensitive variety in non-saline soil was  
309 increased significantly under the treatment of Pro, while that of salt-sensitive variety in saline-alkali soil had no  
310 significant change under the treatment of 3 kinds of amino acids. The amino acids treatment increasing the seed  
311 rutin content might be related to the prolonging of growth period in Tartary buckwheat.

312 High K, Ca and Mg is a common soil condition in saline-alkali soil (Li et al., 2017), which is beneficial to  
313 the enrichment of Ca in saline-alkali plants, and that is in accordance with the results of Tartary buckwheat in  
314 saline-alkali soil. Under the condition of content of Fe and Se in saline-alkali soil significantly lower than that in  
315 non-saline one, while the content of Fe and Se of Tartary buckwheat seeds in saline-alkali soil was significantly  
316 higher than that in non-saline one, indicating that saline-alkali soil environment was beneficial to the enrichment  
317 of Fe and Se in Tartary buckwheat. Meanwhile, appropriate amino acid treatment played a good role in  
318 promoting the enrichment of Ca, Fe and Se in Tartary buckwheat seeds, and made the Tartary buckwheat in  
319 saline-alkali soil more nutritious. According to the analysis of soil composition for 3 years, the content changes  
320 in non-saline and saline-alkali soil are small, and the significant changes in the quality of Tartary buckwheat  
321 should be the result of the effect of exogenous amino acids. Generally speaking, although the yield of Tartary  
322 buckwheat in saline-alkali soil is lower than that in non-saline soil, but the quality of Tartary buckwheat in  
323 saline-alkali soil is better than that in non-saline soil, so it is suitable for popularizing sowing in saline-alkali soil.

324 It's essential to take the relative costs of applying amino acids into account for large-scale agronomic crops,  
325 on the basis of our experiments, the results showed that nearly 150 L proline acid solution with a concentration  
326 of 30  $\mu$ M, 150 L glutamic acid solution with a concentration of 60  $\mu$ M and 150 L aspartic acid solution with a  
327 concentration of 40  $\mu$ M were needed in per hectare soil once. Because the total of 4 times with foliar spraying  
328 during the whole process, following this calculation, 2.07 g proline acid, 5.6 g glutamic acid or 32 g aspartic acid  
329 were needed in per hectare soil. According to the market price of proline acid, glutamic acid and aspartic acid,  
330 approximately \$ 0.33 proline acid, \$ 1 glutamic acid or \$ 5 aspartic acid was needed in per hectare. To sum up,  
331 this way is very environmentally friendly with low cost and can effectively increase the yield and quality of  
332 Tartary buckwheat, so it is very suitable for popularization and application in saline-alkali soil.

### 333 **Conclusion**

334 (1) Yield of Tartary buckwheat in saline-alkaline soil could be increased significantly under the amino acids  
335 treatment. The effect of Asp treatment on yield increase in salt-tolerant variety was the best, and that of Glu  
336 treatment on yield increase in salt-sensitive variety was the best, and that in salt-tolerant variety increased more.

337 (2) The seed protein content of salt-tolerant variety increased significantly under the treatment of Asp, and  
338 that of salt-sensitive variety increased significantly under the treatment of Glu, and the increase in saline-alkali  
339 soil was more than that in non-saline one, and that of salt-tolerant variety increased more.

340 (3) With an appropriate treatment of amino acid, the seed mineral element (Ca, Fe, Zn and Se) content of

341 the two Tartary buckwheat varieties in non-saline and saline-alkali soil was increased significantly, and that of  
342 the salt-tolerant variety was increased more.

343 (4) The seed rutin content of salt-tolerant variety was increased significantly under the treatment of Asp, and  
344 the increase in non-saline soil was more than that in saline-alkali one, and that of salt-sensitive variety in  
345 non-saline soil was increased significantly under the treatment of Pro.

346 (5) The effect of exogenous amino acids on yield and quality of the two Tartary buckwheat varieties were  
347 obviously different.

348 (6) Appropriate amino acid treatment could play a good role in promoting the enrichment of Ca, Fe and Se  
349 of Tartary buckwheat seeds in saline-alkali soil, and made the Tartary buckwheat in saline-alkali soil more  
350 nutritious and suitable for large area popularization and application in saline-alkali soil.

351 (7) This way is very environmentally friendly with low cost and can effectively increase the yield and  
352 quality of Tartary buckwheat, so it is very suitable for popularization and application in saline-alkali soil.

### 353 **Author Contributions**

354 J-NS analyzed the experimental data, and wrote the manuscript. Y-QW determined the element content in  
355 non-saline and saline-alkali soil. SL determined the nutrient content of Tartary buckwheat seed. F-LL guided  
356 sowing and harvesting of Tartary buckwheat. Y-JH determined the yield of Tartary buckwheat. H-BY designed  
357 the experiment and revised the manuscript. All authors read and approved the final manuscript.

### 358 **Funding**

359 This research was financially supported by the National Natural Science Foundation of China (31371552).

### 360 **Conflict of Interest Statement**

361 The authors declare that the research was conducted in the absence of any commercial or financial  
362 relationships that could be construed as a potential conflict of interest.

### 363 **References**

- 364 Chen, H. (2005). Modern nutriology. *Beijing: Chem. Ind. Press.*
- 365 Chen, X., Yang, H. (2012). Effect of exogenous proline on salt tolerance of buckwheat seedlings. *Chinese Agric. Sci. Bull.* 28(36),  
366 92–95. doi: [CNKI:SUN:ZNTB.0.2012-36-018](https://doi.org/10.3724/SP.11052.2012.36.018)
- 367 China Employment Training Technical Instruction Center (CETTIC). (2007). Public nutritionist. *Beijing: China Lab. Soc. Sec. Pub.*  
368 *House.*
- 369 Du, S.K., Li, Z.X., Yu, X.Z. (2004). Research progress on buckwheat protein. *Food Sci.* 5(10), 409–414. doi:

- 370 [CNKI:SUN:SPKX.0.2004-10-121](#)
- 371 Fabjan, N., Rode, J., Kosir, I.J., Wang, Z., Zhang, Z., Kreft, I. (2003). Tartary buckwheat (*Fagopyrum tataricum* Gaertn.) as a  
372 source of dietary rutin and quercitrin. *J. Agric. Food Chem.* 51(22), 6452–6455. doi: [10.1021/jf034543e](#)
- 373 He, H.Z., Hui, F.P. (2008). The research of buckwheat's planting and processing consumption in ancient times. *Agric. Archaeol.* 4,  
374 191–198. doi: [CNKI:SUN:NOSE.0.2008-04-030](#)
- 375 Hui, R.H., Hou, D.Y., Li, X.C., Liu, X.Y., Zhu, Y.Q. (2004). Determination of protein in *Fagopyrum*. *Food Sci.* 25(10), 230–232.  
376 doi: [10.3321/j.issn:1002-6630.2004.10.054](#)
- 377 Ji, P.F., Chen, X.H., Yang, H.B. (2014). Effects of amino acid on physiological traits of buckwheat seedlings under salt stress. *Hubei*  
378 *Agric. Sci.* 53(16), 3749–3752. doi: [10.3969/j.issn.0439-8114.2014.16.007](#)
- 379 Jia, D.Y., Geng, L., Yao, K. (1998). Extraction and identification of flavonoids (Rutin) from the stems and shells of *Fagopyrum*  
380 *tatarium*. *Food Sci.* 19(9), 46–47. doi: [CNKI:SUN:SPKX.0.1998-09-017](#)
- 381 Kim, S.L., Lee, H.B., Park, C.H. (2002). Effect of light source on organic acid, sugar, and flavonoid concentrations in buckwheat.  
382 *Korean J. Crop Sci.* 47(1), 42–47. doi: <http://dx.doi.org/>
- 383 Kreft, S., Strukelj, B., Gaberscik, A., Kreft, I. (2002). Rutin in buckwheat herbs grown at different UV-B radiation levels:  
384 comparison of two UV spectrophotometric and an HPLC method. *J. Exp. Bot.* 53(375), 1801–1804. doi: [10.1093/jxb/erf032](#)
- 385 Li, S.Y., Wang, X.L., Wang, Y.L., Ma, Y.S., Li, S.X. (2017). Analysis of soil nutrients and ions characteristic of Qaidam Basin  
386 saline-alkali land. *Chin. Qinghai J. Anim. Veter. Sci.* 47(6), 36–40.
- 387 Li, Y., Zhang, Y., Sun, M., Gao, B. (2008). Research advance in the effects of salt stress on plant and the mechanism of plant  
388 resistance. *Chin. Agric. Sci. Bull.* 24 (1), 258–265. doi: [CNKI:SUN:ZNTB.0.2008-01-056](#)
- 389 Liang, G., Zhao, M., Zhong, P. (2005). HPLC determination of vitamin B<sub>2</sub> in weimeisut tablets. *Clin. Med.* 25(10), 85–87. doi:  
390 [CNKI:SUN:EBED.0.2005-10-062](#)
- 391 Ma, C.L., Liu, X.H., Pan, J.S., Chen, F.X., Zhuang, W.Q. (2005). Effects of salt stress on the protein synthesis in seedlings of citrus  
392 grandis osbeck and *C.reticulata* blanco. *J. Fujian Agric. For. Univ. (Nat. Sci. Ed.)* 34(4), 450–453. doi:  
393 [10.3321/j.issn:1671-5470.2005.04.011](#)
- 394 Ma, R., Pang, G.C. (2013). Role of rutin in modern civilization diseases. *Food Sci.* 34(7), 307–311. doi:  
395 [CNKI:SUN:SPKX.0.2013-07-066](#)
- 396 Meng, H. (2011). Identification of cloning and transcriptional activation function of a transcription factor gene MYB from  
397 *Fagopyrum Tataricum*. *Sichuan Agric. Univ.*
- 398 Pan, R.M. (2007). Screening of salt tolerant soybean varieties in Jidong coastal areas. *Anhui Agric. Sci. Bull.* 13(7), 158–159. doi:

- 399 [CNKI:SUN:AHNB.0.2007-07-080](#)
- 400 Song, Y.L., Rao, J.P., Wang, T., Wang L.L. (2008). Effects of ALA on post-harvest quality and storability of spinach. *Acta Agric.*
- 401 *Boreali-occidentalis Sin.* 17(3), 258–262. doi: [CNKI:SUN:XBNX.0.2008-03-057](#)
- 402 Wan, H. (2003). Cultivation and management techniques of buckwheat. *Sci. Tech. Train. Farm.* (6), 22. doi:
- 403 [CNKI:SUN:NKPX.0.2003-06-024](#)
- 404 Wang, X.A., Yang, H.B., Qiu, N.W. (2010). Application of paired-sample design in plant physiology experiment. *Plant Physiol. J.*
- 405 46(2), 161–164. doi: [10.13592/j.cnki.ppj.2010.02.004](#)
- 406 Wang, X.P., Zhang, G.X., Lu, X.L., Zhang, X.D. (2007). Cultivation techniques of cotton to coastal saline-alkali paddy soil in
- 407 eastern Hebei province. *J. Anhui Agric. Sci.* 35(19), 5726–5727, 5730. doi: [10.3969/j.issn.0517-6611.2007.19.038](#)
- 408 Wang, Z.C., Wang, Y.H., Chen, J.P., Zhang, E., Wang, H.Y., Hao, M.T. (2013). Effects of nitrogen, phosphorus and potassium
- 409 fertilizers on yield and dry matter accumulation of sweet sorghum on saline land. *Jiangsu Agric. Sci.* 41(11), 80–81. doi:
- 410 [10.3969/j.issn.1002-1302.2013.11.028](#)
- 411 Wu, X.R., Ye, X.S., Zhao, Z.Q. (2009). Comparison of determining the soil total nitrogen concentration with a continuous flow
- 412 injection analyzer and kjeldahl method. *J. Huazhong Agric. Univ.* 28(5), 560–563. doi: [CNKI:SUN:HZNY.0.2009-05-011](#)
- 413 Yang, H.B., Jing, X.M., Qiu, N.W., Wang, B.S. (2001). Effect of maiyefeng on growth and yield of mulched winter wheat on
- 414 seashore alkaline soil. *Shandong Agric. Sci.* (1), 29–30. doi: [CNKI:SUN:AGRI.0.2001-01-013](#)
- 415 Yang, H. (2014). Effects of amino acid on seed germination and seedling growth of buckwheat under salt stress. *Guizhou Agric. Sci.*
- 416 42(8), 30–33. doi: [10.3969/j.issn.1001-3601.2014.08.009](#)
- 417 Yang, L.Y., Yang, W.D. (2002). A crop star of twenty-first century-buckwheat. *World Agric.* (1), 36. doi:
- 418 [10.3969/j.issn.1002-4433.2002.01.013](#)
- 419 Ye, Q., Ge, Y.Q. (1998). The mechanisms of calcium and the research of calcium preparation. *Food Res. Dev.* 19(1), 26–29.
- 420 Zang, Z.H., Cao, L.P., Zhong, L. (2007). Research progress on pharmacological effects and drugs of rutin. *Herald Med.* 26(7),
- 421 758–760. doi: [CNKI:SUN:YYDB.0.2007-07-021](#)
- 422 Zhang, H., Zhao, Y.X., Yang, L.X., Yang, H.D., Zhang, L.X. (2000). Trace elements and human health. *Occup. Heal.* 16(12), 89–92.
- 423 doi: [10.13329/j.cnki.zyyjk.2000.12.086](#)
- 424 Zhang, Q.H., He, R.Q., Zhang, L. (2003). Determination of rutin content in huazhiling tablets by using high performance liquid
- 425 phase chromatography. *China Trop. Med.* 3(3), 359–360. doi: [10.3969/j.issn.1009-9727.2003.03.046](#)
- 426 Zhu, J., Cui, Z., Wu, C., Deng, C., Chen, J., Zhang, H. (2018). Research advances and prospect of saline and alkali land greening in
- 427 China. *World Forest. Res.* 31(4), 70–75. doi: [10.13348/j.cnki.sjlyyj.2018.0034.y](#)

428 Zhu, Y.Z., Shi, H.Y., Jiang, J.H., Dai, L.J. (2009). Monitor of trace elements in buckwheat and relative nutritional value. *J. Shanghai*  
429 *Inst. Tech. (Nat. Sci.)* 9(3), 196–199. doi: [CNKI:SUN:SHSX.0.2009-03-008](https://doi.org/10.1101/2019.12.24.887778)

430

431

## 432 **Legends**

433 Table 1. Large amount of element content in non-saline and saline-alkali soil.

434 Table 2. Trace element content in non-saline and saline-alkali soil.

435 Fig.1. Effect of exogenous amino acids on Tartary buckwheat yield in non-saline and saline-alkali soil.

436 Values followed by different letters are significantly different at the 0.05 probability level ( $n=3$ ). The same as below.

437 Fig.2. Effect of exogenous amino acids on protein content of Tartary buckwheat in non-saline and saline-alkali  
438 soil.

439 Fig.3. Effect of exogenous amino acids on Ca content of Tartary buckwheat in non-saline and saline-alkali soil.

440 Fig.4. Effect of exogenous amino acids on Fe content of Tartary buckwheat in non-saline and saline-alkali soil.

441 Fig.5. Effect of exogenous amino acids on Zn content of Tartary buckwheat in non-saline and saline-alkali soil.

442 Fig.6. Effect of exogenous amino acids on Se content of Tartary buckwheat in non-saline and saline-alkali soil.

443 Fig.7. Effect of exogenous amino acids on vitamin B<sub>2</sub> content of Tartary buckwheat in non-saline and  
444 saline-alkali soil.

445 Fig.8. Effect of exogenous amino acids on rutin content of Tartary buckwheat in non-saline and saline-alkali soil.

446

447

448

449

450

451

452

453

454

455

456



457

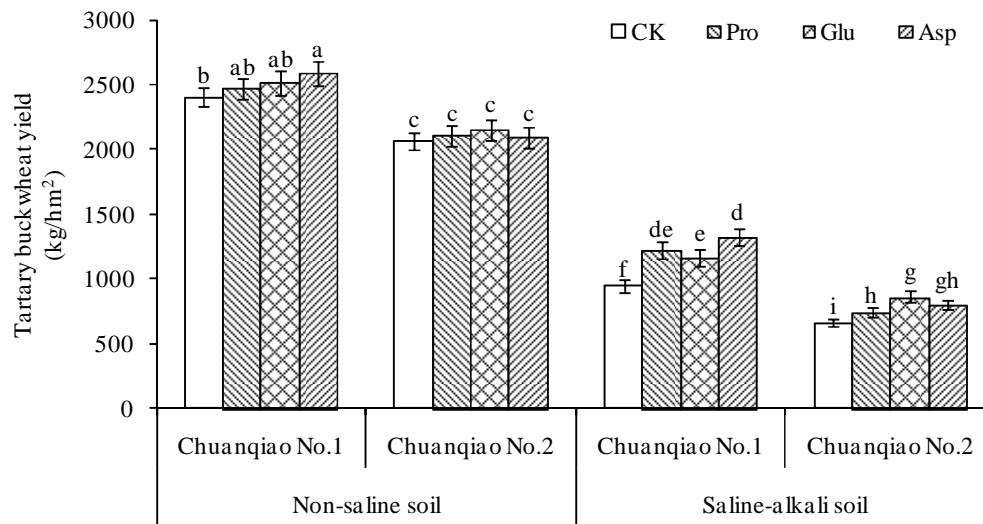

458

459 Fig.1. Effect of exogenous amino acids on Tartary buckwheat yield in non-saline and saline-alkali soil.

460 Values followed by different letters are significantly different at the 0.05 probability level ( $n=3$ ). The same as below.

461

462

463

464

465

466

467

468

469

470

471

472

473

474

475

476

477

478

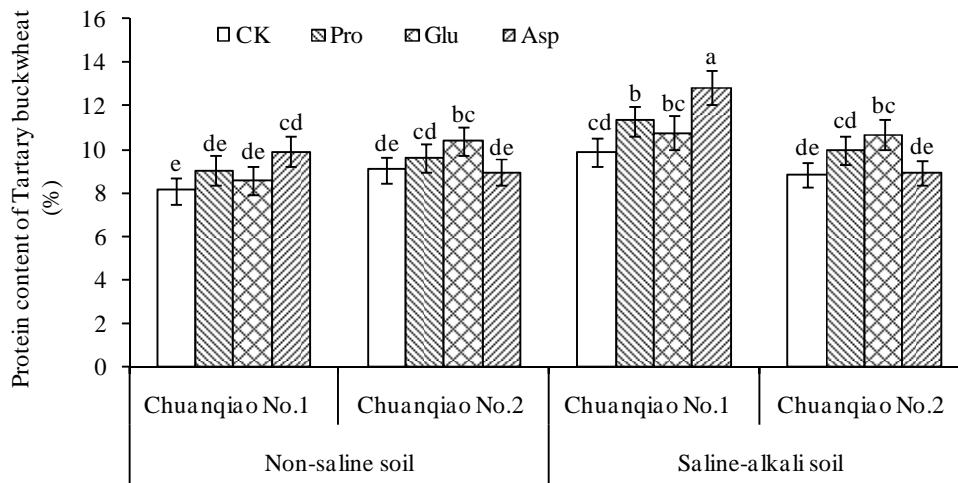

479

480 Fig.2. Effect of exogenous amino acids on protein content of Tartary buckwheat in non-saline and saline-alkali  
481 soil.

482

483

484

485

486

487

488

489

490

491

492

493

494

495

496

497

498

499

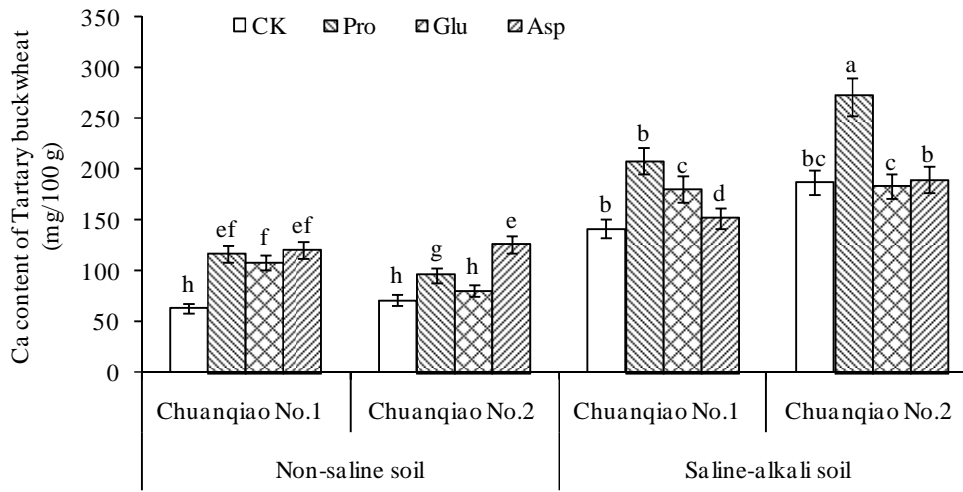

500

501 Fig.3. Effect of exogenous amino acids on Ca content of Tartary buckwheat in non-saline and saline-alkali soil.

502

503

504

505

506

507

508

509

510

511

512

513

514

515

516

517

518

519

520

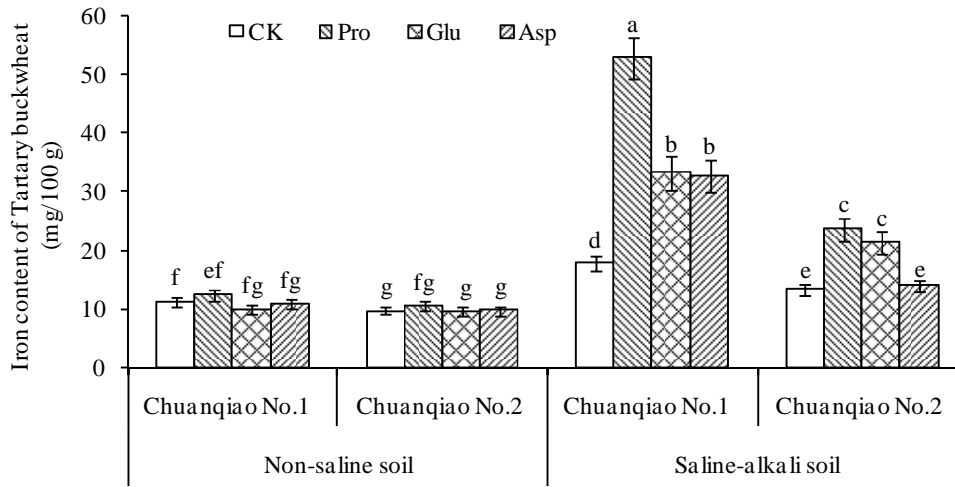

521

522 Fig.4. Effect of exogenous amino acids on Fe content of Tartary buckwheat in non-saline and saline-alkali soil.

523

524

525

526

527

528

529

530

531

532

533

534

535

536

537

538

539

540

541

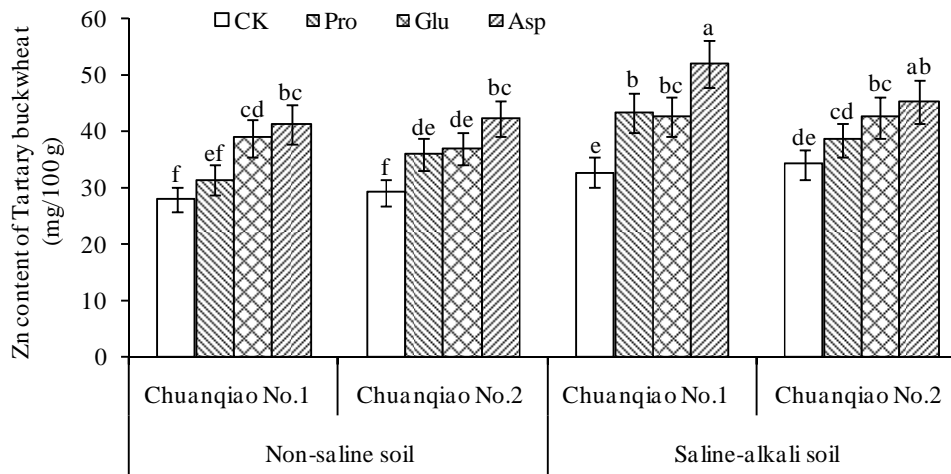

542

543 Fig.5. Effect of exogenous amino acids on Zn content of Tartary buckwheat in non-saline and saline-alkali soil.

544

545

546

547

548

549

550

551

552

553

554

555

556

557

558

559

560

561

562

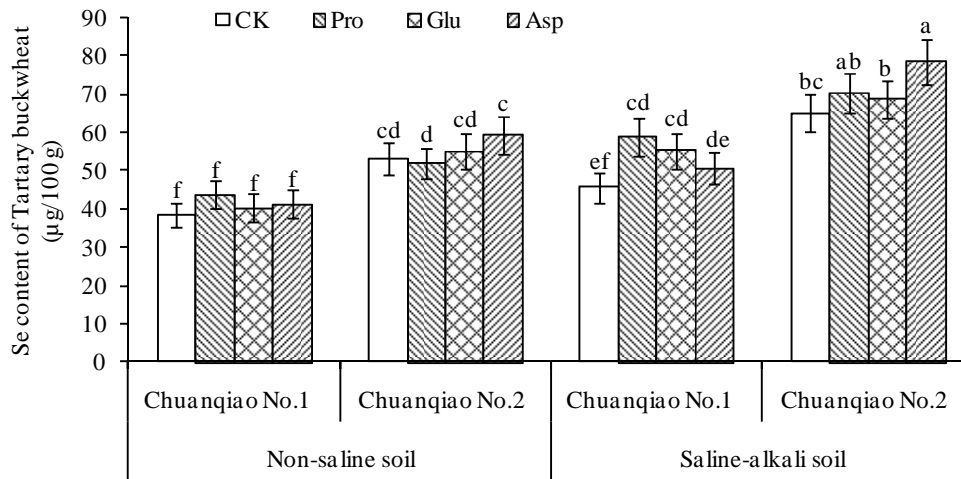

563

564 Fig.6. Effect of exogenous amino acids on Se content of Tartary buckwheat in non-saline and saline-alkali soil.

565

566

567

568

569

570

571

572

573

574

575

576

577

578

579

580

581

582

583

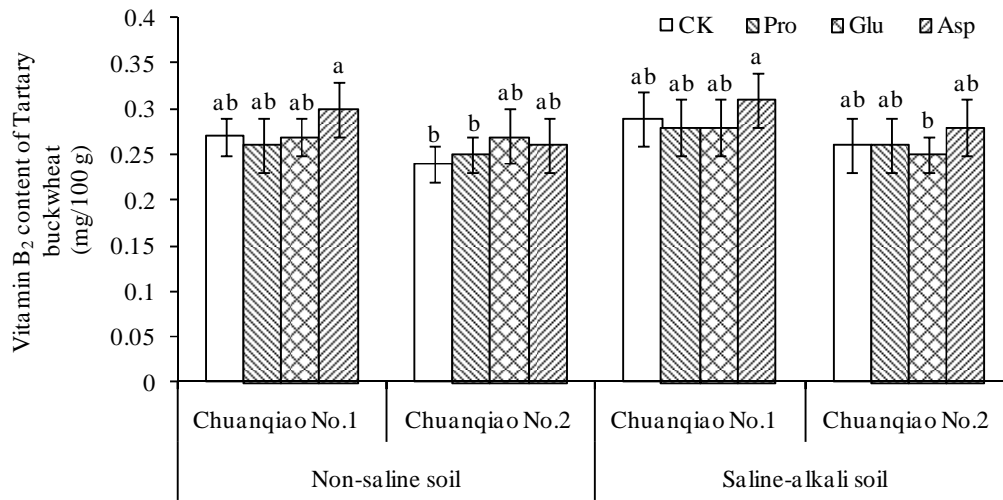

584

585 Fig.7. Effect of exogenous amino acids on vitamin B<sub>2</sub> content of Tartary buckwheat in non-saline and  
586 saline-alkali soil.

587

588

589

590

591

592

593

594

595

596

597

598

599

600

601

602

603

604

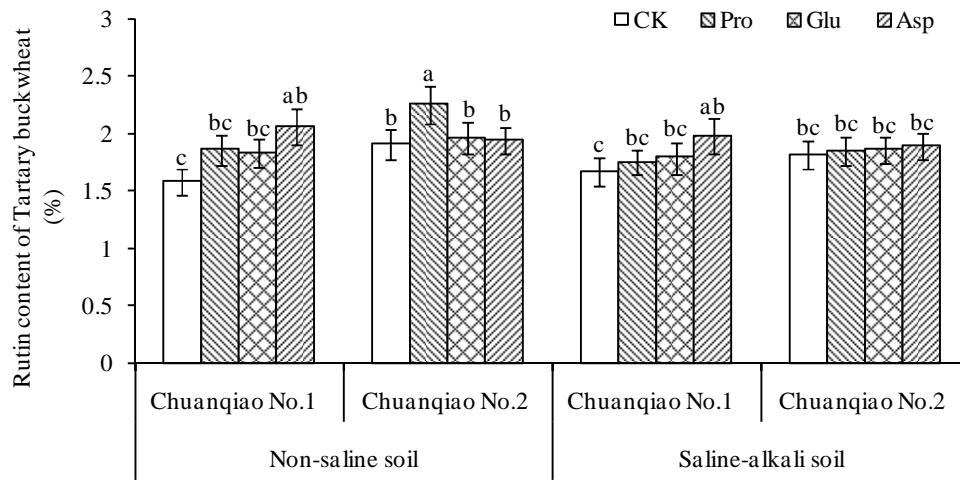

605

606 Fig.8. Effect of exogenous amino acids on rutin content of Tartary buckwheat in non-saline and saline-alkali soil.
